# Supplementary material for: The SCCmec Types and Antimicrobial Resistance among Methicillin-Resistant Staphylococcus Species Isolated from Dogs with Superficial Pyoderma
Source: MDPI journal article supplement (doi:10.3390/vetsci8050085), 2021-05-13
Supplement: s1 [file s1]

**Table S1.** M-PCR1 for amplification of *ccr* gene complex type with *mecA* (Kondo et al., 2007)

| Primer for<br>PCR | Nucleotide sequence (5'-3')  | Constructed<br>on:                            | Reference SCCmec or<br>SCC sequence(s) <sup>a</sup> | Gene(s) or gene allele(s)<br>detected (primer pair) | Expected size of<br>product (bp) |
|-------------------|------------------------------|-----------------------------------------------|-----------------------------------------------------|-----------------------------------------------------|----------------------------------|
| mA1               | TGCTATCCACCCTCAAACAGG        | <i>mecA</i>                                   | Type II.1                                           | <i>mecA</i> (mA1-mA2)                               | 286                              |
| mA2               | AACGTTGTAACCACCCAAGA         | <i>mecA</i>                                   | Type II.1                                           |                                                     |                                  |
| $\alpha$ 1        | AACCTATATCATCAATCAGTACGT     | <i>ccrA1</i>                                  | Type I.1                                            | <i>ccrA1-ccrB</i> ( $\alpha$ 1- $\beta$ c)          | 695                              |
| $\alpha$ 2        | TAAAGGCATCAATGCACAAACACT     | <i>ccrA2</i>                                  | Type II.1                                           | <i>ccrA2-ccrB</i> ( $\alpha$ 2- $\beta$ c)          | 937                              |
| $\alpha$ 3        | AGCTCAAAAGCAAGCAATAGAAT      | <i>ccrA3</i>                                  | Type III.1                                          | <i>ccrA3-ccrB</i> ( $\alpha$ 3- $\beta$ c)          | 1,791                            |
| $\beta$ c         | ATTGCCTTGATAATAGCCITCT       | <i>ccrB1</i> , <i>ccrB2</i> ,<br><i>ccrB3</i> | Type I.1, II.1, III.1                               |                                                     |                                  |
| $\alpha$ 4.2      | GTATCAATGCACCAGAACTT         | <i>ccrA4</i>                                  | Type VI                                             | <i>ccrA4-ccrB4</i> ( $\alpha$ 4.2- $\beta$ 4.2)     | 1,287                            |
| $\beta$ 4.2       | TTGCGACTCTCTTGCGGTTT         | <i>ccrB4</i>                                  | Type VI                                             |                                                     |                                  |
| $\gamma$ R        | CCTTTATAGACTGGATTATTCAAAATAT | <i>ccrC</i>                                   | SCCmercury,<br>Type V                               | <i>ccrC</i> ( $\gamma$ R- $\gamma$ F)               | 518                              |
| $\gamma$ F        | CGTCTATTACAAGATGTTAAGGATAAT  | <i>ccrC</i>                                   | SCCmercury,<br>Type V                               |                                                     |                                  |

<sup>a</sup> Accession numbers deposited in DDBJ/EMBL/GenBank database used as reference sequences for SCCmec elements and SCCmercury are as follows: type I.1 SCCmec, AB033763; type II.1 SCCmec, D86934; type II.2 SCCmec, AB127982; type II.3 (type IIE) SCCmec, AJ810120; type II.4 SCCmec, AB261975; type III.1 SCCmec and SCCmercury, AB037671; type IV.1 SCCmec, AB063172; type IV.2 SCCmec, AB063173; type IV.3 SCCmec, AB096217; type IV.4 SCCmec, AB097677; type V SCCmec, AB121219; type VI SCCmec, AF411935.
