# Supplementary material for: The SCCmec Types and Antimicrobial Resistance among Methicillin-Resistant Staphylococcus Species Isolated from Dogs with Superficial Pyoderma
Source: MDPI journal article supplement (doi:10.3390/vetsci8050085), 2021-05-13
Supplement: s1 [file s1]

**Table S2.** M-PCR2 for amplification of *mec* gene complex class (Kondo et al., 2007)

| Primer for<br>PCR | Nucleotide sequence (5'-3') | Constructed<br>on: | Reference SCCmec or<br>SCC sequence(s) <sup>a</sup> | Gene(s) or gene allele(s)<br>detected (primer pair)           | Expected size of<br>product (bp) |
|-------------------|-----------------------------|--------------------|-----------------------------------------------------|---------------------------------------------------------------|----------------------------------|
| mI6               | CATAACTTCCCATTCTGCAGATG     | <i>mecI</i>        | Type II.1                                           | <i>mecA-mecI</i> (mA7-mI6)                                    | 1,963                            |
| IS7               | ATGCTTAATGATAGCATCCGAATG    | IS1272             | Type I.1                                            | <i>mecA</i> -IS1272 upstream of <i>mecA</i><br>(mA7-IS7)      | 2,827                            |
| IS2(iS-2)         | TGAGGTTATTCAGATATTTTCGATGT  | IS431              | Type V                                              | <i>mecA</i> -IS431 upstream of <i>mecA</i> (mA7-<br>IS2 iS-2) | 804                              |
| mA7               | ATATACCAAACCCGACAACACTACA   | <i>mecA</i>        | Type I.1, II.1, V                                   |                                                               |                                  |

<sup>a</sup> Accession numbers deposited in DDBJ/EMBL/GenBank database used as reference sequences for *SCCmec* elements and *SCCmercury* are as follows: type I.1 *SCCmec*, AB033763; type II.1 *SCCmec*, D86934; type II.2 *SCCmec*, AB127982; type II.3 (type IIE) *SCCmec*, AJ810120; type II.4 *SCCmec*, AB261975; type III.1 *SCCmec* and *SCCmercury*, AB037671; type IV.1 *SCCmec*, AB063172; type IV.2 *SCCmec*, AB063173; type IV.3 *SCCmec*, AB096217; type IV.4 *SCCmec*, AB097677; type V *SCCmec*, AB121219; type VI *SCCmec*, AF411935.
